# Supplementary material for: Effects of Lacticaseibacillus paracasei Strain Shirota on Daytime Performance in Healthy Office Workers: A Double-Blind, Randomized, Crossover, Placebo-Controlled Trial
Source: MDPI journal article supplement (doi:10.3390/nu15245119), 2023-12-15
Supplement: s1 [file s1]

**Table S1.** Effect of LcS on reaction time and ERP P300 latency in the auditory oddball task

| Item                  |    | Time | Placebo      | LcS          |   |
|-----------------------|----|------|--------------|--------------|---|
| Reaction time (ms)    |    | AM   | 365.9 ± 24.2 | 349.2 ± 27.0 |   |
|                       |    | PM   | 381.6 ± 31.3 | 356.0 ± 31.9 |   |
| ERP P300 latency (ms) | Fz | AM   | 330.7 ± 8.0  | 323.4 ± 9.7  | * |
|                       | Cz | AM   | 329.2 ± 9.3  | 321.3 ± 9.2  | * |
|                       | Pz | AM   | 339.3 ± 8.5  | 324.9 ± 9.1  | * |

Reaction time and event-related potential (ERP) latency for the target stimulus in the auditory oddball task were measured during the last week of each 4-week placebo and Lacticaseibacillus paracasei strain Shirota (LcS) intervention period. Values are expressed as means ± standard error (Reaction time: n = 12, ERP P300 latency: n = 10). The Wilcoxon rank sum test was used for the comparison between treatments (\*,  $p < 0.050$ ). AM, morning; PM, afternoon.

**Table S2.** Correlation of the daytime perceived mood with the other indices during the pre-intervention period.

| Time |      | Item                |            | KSS        | VAS        |           |            |           |          |
|------|------|---------------------|------------|------------|------------|-----------|------------|-----------|----------|
|      |      |                     |            |            | Sleepiness | Fatigue   | Motivation | Attention | Optimism |
| AM   | EEG  | Task                | Theta      | -0.149     | 0.133      | -0.007    | -0.004     | 0.007     | 0.070    |
|      |      |                     | Beta/alpha | -0.109     | 0.566      | 0.608 *   | 0.559      | 0.622 *   | 0.413    |
|      |      | Resting eyes-open   | Theta      | -0.260     | 0.144      | 0.049     | 0.025      | 0.039     | 0.210    |
|      |      |                     | Beta/alpha | -0.056     | 0.587 *    | 0.636 *   | 0.566 *    | 0.622 *   | 0.469 *  |
|      |      | Resting eyes-closed | Theta      | -0.179     | -0.147     | -0.245    | -0.231     | -0.196    | -0.119   |
|      |      |                     | Beta/alpha | -0.418     | 0.503      | 0.531     | 0.545      | 0.629 *   | 0.503    |
|      | HRV  | Task                | HR         | -0.091     | -0.028     | -0.102    | -0.137     | -0.165    | -0.151   |
|      |      |                     | HF         | -0.411     | 0.105      | 0.007     | 0.126      | 0.063     | 0.063    |
|      |      |                     | LF/HF      | 0.077      | 0.175      | 0.252     | 0.098      | 0.189     | 0.259    |
|      |      | Resting eyes-open   | HR         | -0.095     | -0.014     | -0.084    | -0.133     | -0.154    | -0.105   |
|      |      |                     | HF         | -0.186     | -0.252     | -0.294    | -0.196     | -0.224    | -0.203   |
|      |      |                     | LF/HF      | 0.354      | -0.308     | -0.196    | -0.371     | -0.308    | -0.231   |
|      |      | Resting eyes-closed | HR         | -0.168     | 0.042      | 0.007     | -0.084     | -0.028    | -0.056   |
|      |      |                     | HF         | 0.056      | -0.399     | -0.420    | -0.406     | -0.441    | -0.336   |
|      |      |                     | LF/HF      | 0.242      | 0.154      | 0.238     | 0.175      | 0.224     | 0.063    |
|      | JPSS |                     | 0.497      | -0.760 **  | -0.729 **  | -0.718 ** | -0.767 **  | -0.676 ** |          |
|      | PSQI |                     | 0.199      | 0.054      | 0.140      | 0.064     | -0.054     | 0.097     |          |
| PM   | EEG  | Task                | Theta      | -0.074     | 0.021      | 0.077     | 0.280      | 0.123     | 0.070    |
|      |      |                     | Beta/alpha | -0.346     | 0.622 *    | 0.685 *   | 0.476      | 0.490     | 0.531    |
|      |      | Resting eyes-open   | Theta      | -0.212     | 0.042      | 0.133     | 0.343      | 0.270     | 0.140    |
|      |      |                     | Beta/alpha | -0.370     | 0.629 *    | 0.622 *   | 0.413      | 0.462     | 0.462    |
|      |      | Resting eyes-closed | Theta      | -0.138     | -0.098     | 0.007     | 0.245      | 0.144     | 0.035    |
|      |      |                     | Beta/alpha | -0.374     | 0.503      | 0.671 *   | 0.608 *    | 0.687 *   | 0.615 *  |
|      | HRV  | Task                | HR         | -0.233     | -0.098     | -0.077    | -0.140     | 0.070     | -0.140   |
|      |      |                     | HF         | 0.360      | -0.811 **  | -0.706 *  | -0.566     | -0.483    | -0.615 * |
|      |      |                     | LF/HF      | -0.268     | 0.273      | 0.210     | 0.161      | 0.214     | 0.147    |
|      |      | Resting eyes-open   | HR         | -0.268     | -0.021     | 0.035     | -0.028     | 0.123     | -0.049   |
|      |      |                     | HF         | 0.247      | -0.657 *   | -0.601 *  | -0.503     | -0.410    | -0.545   |
|      |      |                     | LF/HF      | -0.046     | 0.126      | 0.084     | 0.042      | 0.018     | 0.063    |
|      |      | Resting eyes-closed | HR         | -0.346     | 0.021      | 0.007     | -0.056     | 0.137     | -0.098   |
|      |      |                     | HF         | 0.367      | -0.783**   | -0.678 *  | -0.559     | -0.504    | -0.587 * |
|      |      |                     | LF/HF      | -0.200     | -0.123     | -0.070    | -0.161     | -0.037    | -0.144   |
|      | JPSS |                     | 0.472      | -0.837 *** | -0.753 **  | -0.753 ** | -0.732 **  | -0.771 *  |          |
|      | PSQI |                     | 0.211      | -0.032     | -0.129     | -0.279    | -0.280     | -0.043    |          |

Spearman's rank correlation coefficient ( $\rho$ ) was calculated to assess statistical associations between the daytime perceived mood and the other indices measured during the pre-intervention period ( $n = 12$ , \*  $p < 0.050$ , \*\*  $p < 0.010$ , \*\*\*  $p < 0.001$ ). AM, morning; EEG, electroencephalogram; HF, high-frequency components; HR, heart rate; HRV, heart rate variability; JPSS, Japanese Perceived Stress Score; KSS, Karolinska Sleepiness Scale; LF/HF, index of sympathetic nerve activity; PM, afternoon; PSQI, Pittsburgh Sleep Quality Index; Task, auditory oddball task; VAS, visual analog scale.
